# Supplementary material for: A dynamic microarray device for paired bead-based analysis
Source: Royal Society of Chemistry journal article supplement (doi:10.1039/c004986g), 2010-01-01
Supplement: c004986g.pdf [file c004986g.pdf]

## Supplementary information

### A Dynamic Microarray Device for Paired Bead-based Analysis

Tetsuhiko Teshima,\*<sup>a</sup> Hirotaka Ishihara,<sup>a</sup> Kosuke Iwai,<sup>a</sup> Aki Adachi<sup>a</sup>  
and Shoji Takeuchi<sup>a,b</sup>

June 16, 2010

#### Contents:

ESI VIDEO 1: “real time movie of trapping beads in the trapping sites”

---

<sup>a</sup> Institute of Industrial Science, The University of Tokyo, 4-6-1 Komaba, Meguro-ku, Tokyo, Japan. Fax: +81 (3) 5452-6649; Tel: +81 (3) 5452-6650; E-mail: [takeuchi@iis.u-tokyo.ac.jp](mailto:takeuchi@iis.u-tokyo.ac.jp)

<sup>b</sup> Bio Micro Systems Project, Kanagawa Academy of Science and Technology, 3-2-1 Sakado, Takatsu-ku, Kawasaki, Japan
